# Supplementary material for: Effect of Bariatric Surgery on Serum Inflammatory Factors of Obese Patients: a Systematic Review and Meta-Analysis
Source: Springer Nature journal article supplement (doi:10.1007/s11695-019-03926-0), 2019-05-16
Supplement: MOESM4 [file 16728950]

A


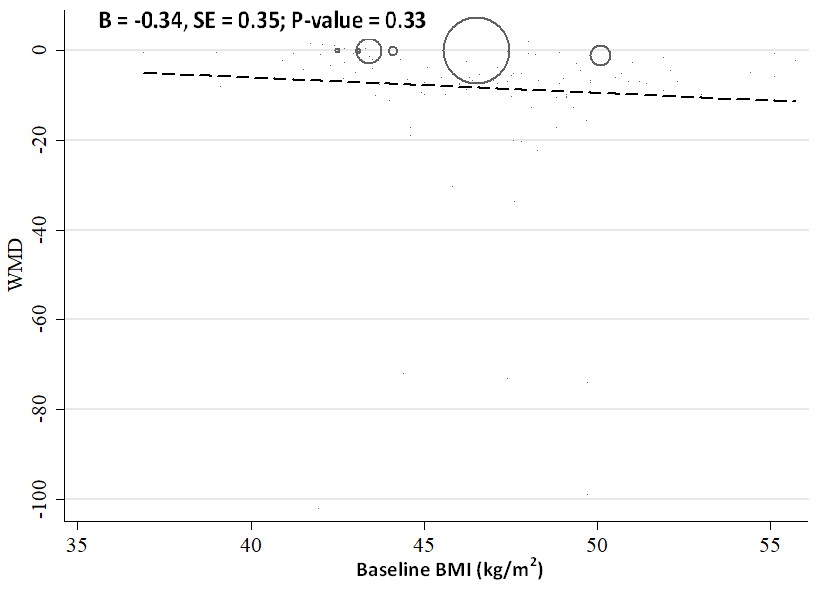


B


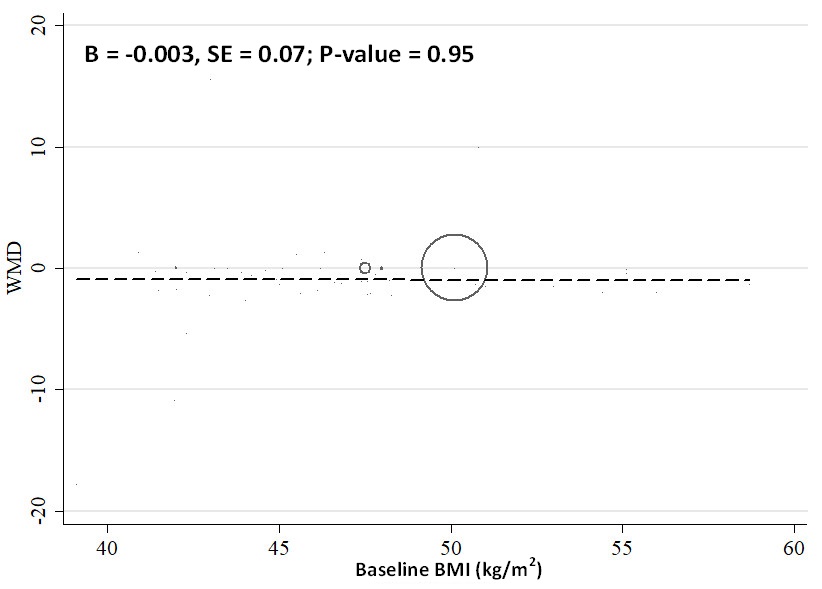


C


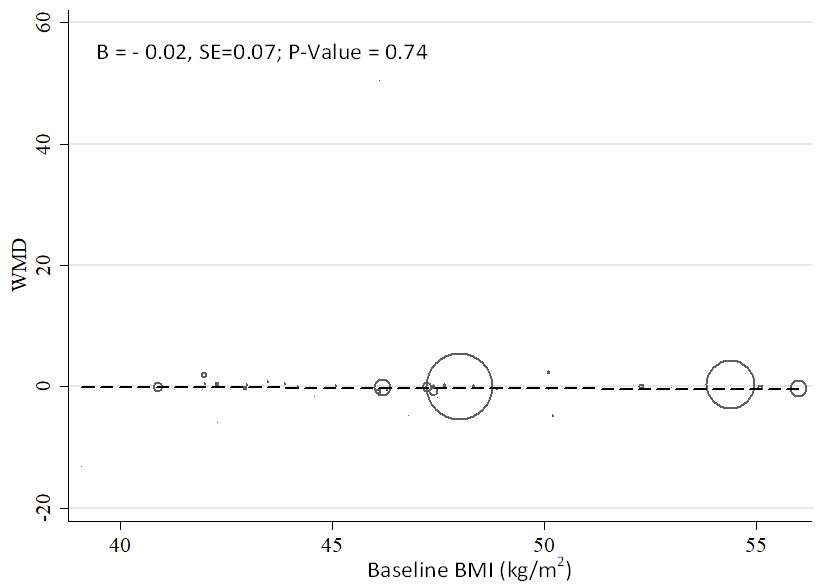


**Supplemental Figure 4:** Random-effects meta-regression plots of the association between baseline BMI (kg/m2) and means of (A) CRP, (**B**) IL-6, (**C**) and TNF-α.
